# Supplementary material for: An Approach to Enhance the Conservation-Compatibility of Solar Energy Development
Source: PLOS journal article supplement (doi:10.1371/journal.pone.0038437), 2012-06-07
Supplement: S2 (10.1371/journal.pone.0038437.s002) [file journal.pone.0038437.s002]

## Supporting Information S2

### **Marxan settings and target amounts for compensatory mitigation scenarios**

Software version: 1.8.10

Number of runs: 100

Number of iterations: 10,000,000

Boundary length modifier: .05

Temperature decreases: 10,000

Initial Temp: Adaptive

Cooling factor: Adaptive

Cost threshold not used

Table S2.1 Mitigation scenario target amounts for current and future scenarios. The species penalty factor is a parameter is adaptively set to ensure targets are met for all features. Other parameter values (type, target2, sepdistance, sepnun, targetocc) were set to 0. The goal amounts are known as “targets” in Marxan terminology, as distinct from targets as used to describe conservation features in this paper.

| <b>Name</b>                             | <b>Subregion</b> | <b>Current goal (ha)</b> | <b>Future goal (ha)</b> | <b>Species penalty factor</b> |
|-----------------------------------------|------------------|--------------------------|-------------------------|-------------------------------|
| Annual Grassland                        | Western          | 202                      | 404                     | 1                             |
| Chaparral                               | Western          | 272                      | 544                     | 100                           |
| Cliff and Canyon                        | Western          | 57                       | 114                     | 1                             |
| Desert Pavement                         | Western          | 6                        | 13                      | 1                             |
| Dunes                                   | Western          | 2                        | 3                       | 1                             |
| Mixed Salt Desert Scrub                 | Western          | 1,837                    | 3,675                   | 1                             |
| Mojave Mid-Elevation Mixed Desert Scrub | Western          | 5,286                    | 10,572                  | 1                             |
| Playa                                   | Western          | 45                       | 91                      | 1                             |
| Southern Willow Scrub                   | Western          | 224                      | 448                     | 1                             |
| Mohave Desert Tortoise                  | Western          | 17,246                   | 34,493                  | 1                             |
| Mohave Ground Squirrel                  | Western          | 1,597                    | 3,194                   | 1                             |
| Annual Grassland                        | South central    | 6                        | 13                      | 1                             |
| Cliff and Canyon                        | South central    | 95                       | 190                     | 1                             |
| Desert Pavement                         | South central    | 3                        | 6                       | 1                             |
| Dunes                                   | South central    | 198                      | 397                     | 1                             |
| Mixed Salt Desert Scrub                 | South central    | 628                      | 1,255                   | 100                           |
| Mojave Mid-Elevation Mixed Desert Scrub | South central    | 320                      | 640                     | 1                             |
| Playa                                   | South central    | 29                       | 57                      | 1                             |
| Southern Willow Scrub                   | South central    | 140                      | 280                     | 1                             |
| Mohave Desert Tortoise                  | South central    | 15,388                   | 30,776                  | 1                             |
| Cliff and Canyon                        | Central          | 309                      | 618                     | 1                             |
| Desert Pavement                         | Central          | 119                      | 238                     | 100                           |
| Dunes                                   | Central          | 137                      | 274                     | 1                             |
| Mixed Salt Desert Scrub                 | Central          | 321                      | 642                     | 1                             |
| Playa                                   | Central          | 754                      | 1,509                   | 100                           |
| Southern Willow Scrub                   | Central          | 437                      | 873                     | 100                           |
| Mohave Desert Tortoise                  | Central          | 30,558                   | 61,116                  | 100                           |
